# Supplementary material
Source: PubMed Central journal article supplement (PMC6910141)
Supplement: supp_7.4.E730_2019-0102-3-at.pdf [file supp_7.4.E730_2019-0102-3-at.pdf]

**Appendix 3 (as supplied by the authors):** Educational materials reviewed by participants

| Province                  | URL                                                                                                                                                                                                                                                       |
|---------------------------|-----------------------------------------------------------------------------------------------------------------------------------------------------------------------------------------------------------------------------------------------------------|
| British Columbia          | <a href="http://www.bccancer.bc.ca/screening/Documents/SMP_BrochurePromo-ScreeningMammographyBrochureEnglish.pdf">http://www.bccancer.bc.ca/screening/Documents/SMP_BrochurePromo-ScreeningMammographyBrochureEnglish.pdf</a>                             |
| Alberta                   | <a href="http://screeningforlife.ca/wp-content/uploads/2016/04/71219-Do-I-really.pdf">http://screeningforlife.ca/wp-content/uploads/2016/04/71219-Do-I-really.pdf</a>                                                                                     |
| Saskatchewan              | <i>Not available online</i>                                                                                                                                                                                                                               |
| Manitoba                  | <a href="https://www.cancercare.mb.ca/export/sites/default/screening/.galleries/files/resources-page-files/b-bro-find-bc-e.pdf">https://www.cancercare.mb.ca/export/sites/default/screening/.galleries/files/resources-page-files/b-bro-find-bc-e.pdf</a> |
| Ontario                   | <a href="https://www.cancercareontario.ca/sites/ccocancercare/files/assets/OBSPInvitationSample.pdf">https://www.cancercareontario.ca/sites/ccocancercare/files/assets/OBSPInvitationSample.pdf</a> (Letter)                                              |
|                           | <a href="https://www.cancercareontario.ca/sites/ccocancercare/files/assets/OBSPBrochureNotObvious.pdf">https://www.cancercareontario.ca/sites/ccocancercare/files/assets/OBSPBrochureNotObvious.pdf</a> (Brochure)                                        |
| Quebec                    | <a href="http://publications.msss.gouv.qc.ca/msss/en/document-001880/">http://publications.msss.gouv.qc.ca/msss/en/document-001880/</a>                                                                                                                   |
| Nova Scotia               | <i>Not available online</i>                                                                                                                                                                                                                               |
| Newfoundland and Labrador | <i>Not available online</i>                                                                                                                                                                                                                               |
| Northwest Territories     | <a href="https://www.hss.gov.nt.ca/sites/hss/files/nwt-breast-cancer-screening.pdf">https://www.hss.gov.nt.ca/sites/hss/files/nwt-breast-cancer-screening.pdf</a>                                                                                         |
| Yukon                     | <a href="https://yukonhospitals.ca/sites/default/files/mammography_program_brochure.pdf">https://yukonhospitals.ca/sites/default/files/mammography_program_brochure.pdf</a>                                                                               |

\* Note: Some brochures may have been updated since the deliberations were held.
